# Supplementary material
Source: publisher site journal article supplement (https://www.spandidos-publications.com/1903/downloadSupplementary)
Supplement: Supplementary file 1 [file downloadSupplementary]

## Sheet: Sheet2
Table SIV. Change of expression in long non-coding (lnc)RNAs.
lncRNA expressional difference	Expression average of tumor samples	Expression average of normal samples	ID	TCGA-91-6847-11A-01R-1949-07	TCGA-49-4490-11A-01R-1858-07	TCGA-55-6984-11A-01R-1949-07	TCGA-44-6144-11A-01R-1755-07	TCGA-91-6828-11A-01R-1858-07	TCGA-44-6145-11A-01R-1858-07	TCGA-49-6744-11A-01R-1858-07	TCGA-44-6778-11A-01R-1858-07	TCGA-38-4632-11A-01R-1755-07	TCGA-55-6982-11A-01R-1949-07	TCGA-44-2661-11A-01R-1758-07	TCGA-91-6829-11A-01R-1858-07	TCGA-44-2668-11A-01R-1758-07	TCGA-44-2657-11A-01R-1758-07	TCGA-44-6776-11A-01R-1858-07	TCGA-38-4625-11A-01R-1758-07	TCGA-55-6983-11A-01R-1949-07	TCGA-44-5645-11A-01R-1628-07	TCGA-49-6761-11A-01R-1949-07	TCGA-50-5932-11A-01R-1755-07	TCGA-50-5931-11A-01R-1858-07	TCGA-38-4627-11A-01R-1758-07	TCGA-50-6595-11A-01R-1858-07	TCGA-55-6980-11A-01R-1949-07	TCGA-55-6981-11A-01R-1949-07	TCGA-49-6745-11A-01R-1858-07	TCGA-55-6985-11A-01R-1949-07	TCGA-91-6836-11A-01R-1858-07	TCGA-55-6979-11A-01R-1949-07	TCGA-55-6970-11A-01R-1949-07	TCGA-91-6849-11A-01R-1949-07	TCGA-44-6148-11A-01R-1858-07	TCGA-73-4676-11A-01R-1755-07	TCGA-44-2662-11A-01R-1758-07	TCGA-50-5939-11A-01R-1628-07	TCGA-50-5935-11A-01R-1858-07	TCGA-50-5933-11A-01R-1755-07	TCGA-91-6831-11A-02R-1858-07	TCGA-50-5936-11A-01R-1628-07	TCGA-55-6975-11A-01R-1949-07	TCGA-49-6743-11A-01R-1858-07	TCGA-55-6968-11A-01R-1949-07	TCGA-49-6742-11A-01R-1858-07	TCGA-55-6978-11A-01R-1949-07	TCGA-44-6777-11A-01R-1858-07	TCGA-44-6146-11A-01R-1858-07
lncRNAdown	0.271186	9.25234	LINC00483	0	1	0	1	0	0	0	1	0	0	0	0	0	0	1	0	0	0	0	0	0	0	2	0	0	0	0	1	1	0	0	0	0	1	0	0	0	0	0	0	0	0	0	0	1	2
lncRNAdown	2.61017	83.2617	DLX6-AS1	0	2	0	0	1	0	1	0	0	3	3	1	0	13	1	0	1	0	4	0	0	41	2	1	1	0	1	0	0	1	1	2	0	2	0	12	0	0	0	0	0	1	1	0	1	0
lncRNAdown	12.8136	142.624	C20orf197	4	5	12	14	16	12	10	25	13	10	18	23	26	11	6	14	21	8	2	12	14	12	26	5	12	12	35	8	5	22	9	20	4	16	9	9	16	8	12	9	2	5	11	16	5	5
lncRNAdown	0.847458	5.36262	LINC00330	0	1	5	0	1	0	1	0	1	0	1	0	1	1	2	0	0	0	0	0	0	4	0	0	2	0	1	1	0	0	1	0	0	0	2	0	0	1	0	0	0	1	2	0	0	0
lncRNAdown	0.338983	4.99626	LSAMP-AS1	0	0	0	0	0	0	0	1	1	1	0	0	0	1	0	0	0	0	0	0	0	0	2	0	1	1	0	0	0	1	0	0	0	0	0	0	0	0	0	1	1	1	0	0	3	0
lncRNAdown	0.0169492	8.02804	ERVMER61-1	0	0	0	0	0	0	0	0	0	0	0	0	0	0	0	0	0	0	0	1	0	0	0	0	0	0	0	0	0	0	0	0	0	0	0	0	0	0	0	0	0	0	0	0	0	0
lncRNAdown	0.576271	3.83178	GRM5-AS1	4	0	1	0	0	0	0	1	0	0	0	1	0	1	0	0	0	0	0	0	0	0	0	0	0	0	0	0	0	0	4	1	0	0	0	0	1	0	0	0	0	0	3	1	0	0
lncRNAdown	1.0678	17.9626	LINC00160	0	0	0	0	3	4	0	1	1	1	1	1	10	0	0	3	2	1	0	0	0	0	1	0	0	0	7	1	0	0	0	1	0	0	0	0	1	1	0	1	0	0	3	0	2	0
lncRNAdown	0.644068	37.3103	LINC00221	0	2	1	1	0	0	0	0	2	0	0	0	0	0	0	1	0	0	0	1	1	0	4	0	0	2	3	0	0	1	0	0	0	0	0	0	0	0	2	0	0	0	2	0	0	4
lncRNAdown	6	26.2879	TCL6	1	1	0	0	2	7	0	4	6	2	4	2	7	96	1	3	1	18	0	2	0	4	3	4	0	1	9	31	3	3	12	17	2	5	0	2	0	1	3	2	0	3	15	3	4	6
lncRNAdown	10.322	48.6056	SYNPR-AS1	6	2	18	1	14	11	4	2	1	13	2	11	2	8	7	13	13	11	1	2	0	3	8	10	4	26	12	4	3	3	7	42	6	0	1	7	21	1	2	3	3	8	21	20	8	3
lncRNAdown	0.542373	5.91028	AC112721.1	0	4	1	1	1	0	0	0	1	2	0	0	0	1	0	0	0	0	0	0	1	0	0	0	0	0	0	0	3	0	0	2	0	1	0	0	1	2	0	0	0	4	0	2	0	1
lncRNAdown	1.76271	13.8617	ZBTB20-AS1	0	0	3	0	2	1	0	4	0	2	3	1	0	8	1	0	4	0	2	1	0	1	1	1	1	1	2	6	0	3	0	2	0	0	1	1	2	0	0	4	2	1	0	4	1	2
lncRNAdown	0.932203	12.3757	ABCA9-AS1	0	0	1	0	1	0	1	3	2	0	1	0	1	0	0	2	1	0	0	1	0	0	2	0	2	1	6	0	0	2	0	1	1	0	0	2	0	1	1	2	2	0	0	1	0	1
lncRNAdown	21.4407	299.591	LINC00473	0	73	1	0	0	22	4	30	7	1	2	0	14	0	0	4	0	1	2	32	2	2	1	0	6	34	3	6	2	3	0	0	0	0	16	1	18	5	1	16	37	3	61	1	1	4
lncRNAdown	4.86441	35.8243	EGOT	2	3	3	1	5	4	0	6	5	12	8	5	4	8	2	8	4	4	2	2	1	5	6	1	2	1	12	4	6	7	0	2	5	8	6	2	7	3	1	4	7	2	11	4	3	4
lncRNAdown	0.79661	3.51589	LINC00517	0	1	0	0	1	0	0	0	0	0	3	0	1	0	0	5	0	1	0	0	0	1	0	0	0	1	0	0	0	0	1	0	0	0	0	3	2	0	0	0	0	0	1	0	0	1
lncRNAdown	93.0508	790.409	PVT1	27	61	71	71	41	132	60	66	54	79	131	130	175	254	61	259	58	64	43	50	53	84	87	30	19	65	294	74	59	66	41	72	45	93	42	47	168	29	45	47	73	172	130	64	88	32
lncRNAdown	5.54237	151.426	LINC00460	0	42	9	7	1	5	4	1	5	1	6	8	9	7	5	11	4	3	1	0	7	11	5	0	0	12	10	0	1	3	0	1	8	7	0	0	10	0	8	5	7	13	16	1	9	1
lncRNAdown	3.69492	34.3607	LINC00337	1	4	7	2	0	8	2	7	5	3	5	3	5	9	2	2	4	6	1	0	2	6	5	1	5	5	11	0	1	1	1	5	3	4	2	0	5	1	4	3	2	0	4	8	1	5
lncRNAdown	8.23729	256.064	ERVH48-1	3	1	19	5	10	8	8	7	1	11	8	9	3	5	5	5	5	9	4	1	10	7	17	7	13	10	26	15	2	12	8	16	6	7	4	4	10	3	3	5	11	7	2	6	2	11
lncRNAdown	0.0338983	3.26542	POU6F2-AS1	0	0	0	0	0	0	0	0	0	0	0	0	0	0	0	0	0	0	0	0	0	0	0	0	0	0	2	0	0	0	0	0	0	0	0	0	0	0	0	0	0	0	0	0	0	0
lncRNAdown	0.762712	2.14579	CECR3	0	0	1	0	0	0	0	0	0	0	0	1	0	2	0	3	0	0	0	0	0	0	1	0	1	0	2	5	0	0	0	3	0	0	0	0	0	0	0	2	2	1	1	2	1	1
lncRNAdown	0.40678	5.7514	STEAP2-AS1	1	0	0	0	1	0	0	0	0	1	0	1	0	1	0	0	0	1	0	0	0	0	0	0	0	0	1	0	0	0	1	0	0	0	0	1	0	0	0	0	2	0	1	0	1	0
lncRNAdown	1.38983	10.2093	IGF2-AS	0	0	1	0	0	0	1	0	0	2	1	1	0	7	0	1	0	2	0	0	2	1	1	2	3	1	3	0	0	0	0	1	0	2	7	3	1	0	0	0	1	3	2	0	1	1
lncRNAdown	0.779661	27.1869	LINC00355	0	0	0	0	0	0	0	2	0	1	0	8	0	0	0	0	0	0	0	1	0	0	0	3	0	0	0	0	0	0	0	0	0	0	13	0	0	0	0	0	13	0	0	0	0	1
lncRNAdown	0.389831	2.46916	ANO1-AS2	0	0	2	0	0	0	0	0	0	0	0	0	0	0	0	0	1	0	0	0	1	1	1	2	0	0	1	0	0	0	0	1	0	2	0	0	5	0	0	0	1	0	0	0	0	0
lncRNAdown	6.01695	323.351	MUC2	2	0	2	18	3	20	1	0	0	1	1	3	8	0	1	0	2	0	0	0	2	0	1	0	0	2	37	1	0	0	1	7	0	0	0	1	0	0	0	0	0	3	0	0	1	6
lncRNAdown	0.0677966	4.14953	LINC00466	0	0	0	0	0	0	0	0	0	0	0	0	1	0	0	0	0	0	0	0	0	0	0	0	0	1	0	0	0	0	0	0	0	0	0	0	0	0	0	0	0	0	0	0	0	0
lncRNAdown	0.389831	11.9402	LINC00461	1	0	1	0	1	1	0	0	0	2	0	0	0	2	0	2	0	0	0	0	0	0	0	0	0	0	0	0	0	3	0	0	0	0	0	0	0	1	1	0	0	0	0	0	0	0
lncRNAdown	3.27119	37.6598	LINC00470	1	1	1	2	2	0	1	13	1	0	0	0	2	0	3	4	0	2	0	0	2	0	11	0	0	7	0	0	0	1	0	35	7	2	6	2	0	0	2	5	0	2	1	0	1	0
lncRNAdown	0.508475	41.0916	NOVA1-AS1	1	0	0	0	2	1	1	0	0	0	0	0	0	0	3	0	2	0	0	0	0	0	0	1	0	0	8	0	0	0	0	0	0	0	0	0	0	0	0	0	1	0	0	1	0	0
lncRNAdown	0.169492	2.51028	FNDC1-IT1	0	0	0	0	0	0	0	0	0	0	0	0	0	0	0	0	1	0	0	0	0	0	0	0	1	0	1	0	0	0	0	0	0	0	0	0	0	1	0	0	1	0	0	0	1	0
lncRNAdown	0.0169492	3.09159	LINC00518	0	0	0	0	0	0	0	0	0	0	0	0	0	0	0	0	0	0	0	0	0	0	0	0	0	0	0	0	0	0	1	0	0	0	0	0	0	0	0	0	0	0	0	0	0	0
lncRNAdown	6.25424	79.2486	KIF25-AS1	0	12	3	8	4	2	6	2	0	21	9	0	10	34	7	0	0	0	0	1	0	8	14	0	7	1	6	4	1	24	0	5	1	21	4	0	1	5	10	1	1	4	2	1	16	6
lncRNAdown	0.271186	14.6579	MIR137HG	0	0	0	0	0	1	0	0	0	0	0	3	0	0	0	0	1	0	0	0	0	0	0	0	1	0	4	0	0	0	0	0	0	0	0	0	0	0	0	1	1	0	1	0	0	0
lncRNAdown	0.355932	2.75327	C11orf44	0	0	0	0	0	0	0	0	0	0	0	0	0	0	0	2	0	0	0	0	1	0	0	1	1	0	4	0	0	0	0	0	1	1	0	0	1	0	0	2	0	1	0	0	0	1
lncRNAdown	6.13559	40.1981	C1orf220	5	4	8	3	4	2	6	6	5	8	9	9	7	41	1	0	4	6	2	2	0	1	12	3	7	1	15	1	4	6	2	9	0	3	1	2	6	4	3	6	6	9	2	3	0	0
lncRNAdown	3.11864	36.7701	C2orf48	0	1	3	6	1	4	2	1	2	5	0	6	4	9	3	0	4	2	0	0	2	1	2	1	1	1	2	2	4	6	4	4	2	3	1	2	7	1	3	5	0	5	6	2	3	1
lncRNAdown	0.542373	10.2206	MYCNOS	0	2	0	0	0	0	0	0	0	0	1	0	0	0	0	2	0	0	2	0	0	2	1	0	0	0	0	0	1	0	0	0	0	0	0	1	0	0	0	0	0	2	2	0	1	0
lncRNAdown	0.40678	25.1738	NAALADL2-AS2	0	1	1	1	1	0	2	0	0	0	0	1	0	0	1	0	0	0	0	0	0	1	0	0	0	2	0	0	0	0	0	2	0	1	0	0	0	1	1	0	0	0	2	0	0	0
lncRNAdown	0.457627	2.40935	SMCR2	0	0	0	0	1	0	0	0	1	0	0	2	1	0	0	1	0	4	0	2	0	0	1	1	1	0	2	0	0	1	0	0	0	0	0	0	1	0	1	0	0	0	0	0	0	0
lncRNAdown	0.457627	28.9047	LINC00501	0	1	1	0	0	0	1	1	1	0	0	0	0	0	0	1	1	0	0	0	0	0	1	2	0	0	0	0	0	0	0	1	0	0	0	1	0	0	0	2	0	1	0	1	0	0
lncRNAdown	0.457627	2.7028	TCEAL3-AS1	0	0	1	1	0	0	0	3	0	0	0	0	0	0	0	1	1	0	0	0	0	0	0	1	1	0	1	0	0	0	0	2	0	0	1	1	0	2	0	0	0	1	0	0	0	0
lncRNAup	41.4407	5.13645	LINC00163	36	84	35	47	19	57	26	32	10	27	31	14	24	17	22	202	16	48	12	63	42	57	137	44	33	27	29	15	9	19	23	29	4	51	27	27	59	18	38	40	57	6	27	32	24	69
lncRNAdown	15.6441	132.047	HNF1A-AS1	11	3	30	4	31	9	22	12	1	20	16	10	1	11	8	13	9	48	6	6	8	4	23	8	27	11	9	22	2	7	53	65	1	8	13	14	8	3	3	2	3	6	23	18	5	8
lncRNAdown	0.118644	7.38879	LINC00393	0	0	0	0	0	0	0	0	1	2	0	0	0	1	0	0	0	0	0	0	0	0	0	0	0	0	0	0	0	0	0	0	0	0	0	0	0	0	0	0	0	0	0	0	0	0
lncRNAdown	4.72881	331.884	UCA1	2	38	3	2	15	7	2	1	2	4	9	8	9	14	4	5	5	2	2	7	8	5	0	2	1	0	6	2	0	3	7	9	3	5	0	2	2	0	1	4	2	3	9	3	9	1
lncRNAdown	0.779661	9.34579	VCAN-AS1	0	0	0	0	5	0	0	1	0	3	0	1	1	0	1	1	0	0	0	1	0	0	0	0	0	0	4	2	0	2	0	1	0	1	1	0	2	2	0	2	0	0	0	1	0	0
lncRNAdown	1.76271	21.2617	MIR31HG	1	6	2	1	4	1	1	0	0	3	1	1	1	1	0	3	1	1	0	1	0	0	3	0	0	1	6	0	0	1	5	3	0	0	0	0	2	0	1	0	1	1	1	2	1	0
lncRNAdown	0.322034	3.84112	LINC00051	0	1	0	0	0	0	0	0	0	0	0	0	0	0	1	0	1	0	0	1	0	0	1	0	0	0	0	1	0	1	0	0	0	0	1	0	2	0	0	0	0	0	0	0	0	0
[truncated: 548 more columns]
